# Supplementary material for: Choroidal structural changes correlate with severity of diabetic retinopathy in diabetes mellitus
Source: BMC Ophthalmol. 2019 Aug 16;19:186. doi: 10.1186/s12886-019-1189-8 (PMC6697939; doi:10.1186/s12886-019-1189-8)
Supplement: Supplementary file 1 — Demographic and clinical data in this study. (XLSX 24 kb) [file 12886_2019_1189_MOESM1_ESM.xlsx]

## Sheet: normal
Age	Sex	BMI	Systolic BP	Diastolic BP	BCVA	REFRACTIVE	IOP	axial length	视网膜出血	微动脉瘤
		26.17	125	85			18	24.55
		19.36	121	82			16.8	24.33
		23.88	121	75			12.6	22.94
		19.92	121	69			13.6	24.18
		23.44	125	88			16.3	24.04
		23.27	127	82			13.7	23.59
		27.55	127	76			15.4	24.18
		27.68	122	77			16.4	24.63
		22.93	122	86			14.7	24.27
		25.77	129	78			17.4	23.44
		26.67	124	72			14	24.01
		25.39	124	80			16.9	24.21
		25.72	122	81			14.2	23.27
		25.1	135	79			15.3	24.2
		23.44	124	77			16.2	24.93
		27.1	118	89			15	24.73
		28.4	122	86			14.4	25.43
		25.95	126	77			12.9	23.79
		21.71	123	90			16.6	24.92
		22.89	127	83			17.7	24.93
		29.41	127	86			14	23.46
		23.34	127	74			15.5	24.68
		25.95	120	85			13.9	24.54
		21.72	119	87			15.1	24.76
		27.55	130	92			16.8	25.55
		25.93	120	75			15.7	23.8
		24.98	122	82			15	22.74
		23.66	125	74			13.3	23.95
		25.81	130	71			17.6	24.31
		19.92	130	84			14.8	24.06
		19.81	129	79			16	23.71
		24.8	127	77			16.2	23.61
		25.01	124	81			13.8	23.47
		23.88	130	85			13.6	23.11
		24.89	125	69			14.7	23.97
		20.7	120	77			13.3	24.32
		21.37	123	80			13.3	23.77
		25.39	128	76			13.7	23.61
		24.3805	124.763	80.1579			15.1158	24.105

## Sheet: DM
Age	Sex	BMI	diabetes Course	HbA1c	空腹血糖	餐后血糖	收缩压	舒张压	BCVA	REFRACTIVE	IOP	Ocular axial length	视网膜出血	微动脉瘤
		22.38
		29.76
		22.06
		27.96
		24.91
		24.22
		25.82
		25.39
		24.3
		31.38
		25.71
		24.44
		25.04
		26.77
		26.45
		26.71
		25.61
		24.92
		26.81
		28.58
		31.25
		22.78
		26.75
		20.22
		19.97
		22.49
		24.07
		24.39
		16.33
		22.17
		22.04
		24.22
		22.49
		25.65
		30.85
		25.25
		22.89
		27.65
		25.39
		28.46
		24.8
		24.22
		22.46
		31.3
		34.6
		22.72
		27.34
		25.35
		18.23
		23.05
		23.44
		24.49
		19.98
		23.94
		19.53
		24.17
		22.32
		23.12
		28.13
		19.23
		21.3
		24.92
		30.86
		22.94
		25.69
		27.34

## Sheet: no-DR(22)
Age	Sex	BMI	diabetes Course	HbA1c	Fasting plasma glucose		Systolic BP	Diastolic BP	BCVA	REFRACTIVE	IOP	axial length	视网膜出血	微动脉瘤
		22.38	5	6.9	8		130	88			15.1	23.36
		29.76	6	7	6.8		128	79			20.5	24
		22.06	6	7.5	8.4		125	79			12	24.14
		27.96	7	7.1	7.9		129	81			15.5	22.69
		24.91	6.5	7.1	7.9		118	83			16.3	23.82
		24.22	5	6.9	7.9		113	71			11.2	23.72
		25.82	4	6.6	7.8		116	87			13.4	23.97
		25.39	3.5	6.9	7.7		121	83			16.6	23.07
		24.3	6	7.2	7		124	82			15	24.82
		31.38	7	7.5	6.9		124	76			15.5	22.99
		25.71	8	8.8	8		117	84			14.7	23.92
		24.44	3	7.5	6.3		122	83			16.6	24.66
		25.04	4	8.7	6.9		131	80			15.2	24.66
		26.77	5	8.1	7.6		125	77			16.5	23.37
		26.45	5	7.7	7.4		124	78			13.1	24.49
		26.71	4	6.8	7.2		113	75			14.3	24.57
		25.61	5	6.4	8.1		117	78			14.9	22.97
		24.92	4.5	7.3	6.5		117	88			17.6	23.47
		26.81	4	8.8	6		121	68			8.8	23.71
		28.58	4	8.6	7.1		122	72			17.8	23.09
		31.25	6	8.5	6.2		131	80			12.5	24.47
		22.78	6.5	8	8.6		124	80			20	24.94
		26.0568	5.22727	7.54091	7.37273		122.364				15.1409	23.8591

## Sheet: NPDR(24)
Age	Sex	BMI	diabetes Course	HbA1c	Fasting plasma glucose		Systolic BP	Diastolic BP	BCVA	REFRACTIVE	IOP	axial length	视网膜出血	微动脉瘤
		26.75	8	7.1	7.7		120	80			17.6	24.23
		20.22	9	7	8.1		118	81			13.2	24.32
		19.97	6	8.9	6.4		127	82			14	25.52
		22.49	7	8.1	6.4		124	73			11.5	24.53
		24.07	7.5	8	8.3		123	76			16.1	24.81
		24.39	7	7.7	7.1		128	77			12.2	24.25
		16.33	6.5	7.1	6.5		122	80			13	23.93
		22.17	9	8.8	7.7		117	83			16.3	24.69
		22.04	10	7.9	8.4		123	86			20	24.82
		24.22	11	7	8.5		123	78			14.8	25.04
		22.49	11.5	7.3	7.6		122	68			18.8	24.35
		25.65	12	7.4	7		131	73			17.6	23.82
		30.85	12	9.1	8.2		124	79			8.8	24.73
		25.25	11	8	5.8		124	88			17.8	23.72
		22.89	10.5	8.1	9.2		126	79			12.5	23.12
		27.65	10	9.4	6.6		128	85			23	24.18
		25.39	9.5	8.8	7		112	76			17.6	23.92
		28.46	9	6.7	8.1		121	75			13.2	24.16
		24.8	8	6.9	8.3		124	72			14	23.53
		24.22	10	9.1	7.8		119	92			11.5	24.61
		22.46	10	9.2	6.2		124	79			16.1	23.4
		31.3	14	8.5	8.6		129	75			14	23.95
		34.6	14.5	7.7	8.3		127	80			11.5	24.41
		22.72	13.5	7.3	6.8		129	78			16.1	24.54
		24.6408	9.85417	7.9625	7.525

## Sheet: PDR(20)
Age	Sex	BMI	diabetes Course	HbA1c	Fasting plasma glucose		Systolic BP	Diastolic BP	BCVA	REFRACTIVE	IOP	axial length
		27.34	15	8.8	8.5		128	68			16.3	24.27
		25.35	13	8.9	7.9		125	82			20.8	24.22
		18.23	13.5	9.2	8		121	75			11.1	23.75
		23.05	12.5	9	7.1		134	82			9.8	25.7
		23.44	12	8.6	9.7		125	86			16.5	23.09
		24.49	11	7.9	7.1		129	80			14.5	24.3
		19.98	13	10.1	8.9		117	86			12.2	24.07
		23.94	14	9.3	6.3		121	76			13.5	24.22
		19.53	14.5	8.8	8.4		122	77			17.8	24
		24.17	15	8.4	8.9		125	72			16.8	24.3
		22.32	13.5	7.1	8.4		130	87			19.2	23.26
		23.12	12.5	6.4	6.2		115	81			15.4	23.42
		28.13	12	9.9	6.4		129	79			13.6	23.53
		19.23	13	9.3	7.7		119	80			14.1	23.71
		21.3	10	9	6.8		128	82			14.4	23.6
		24.92	8	7.7	7.8		120	74			1.2	24.81
		30.86	7	7	8.1		128	80			12.9	23.71
		22.94	8.5	8.8	7		122	84			13	23.82
		25.69	9	8.1	8.5		130	79			13.3	23.82
		27.34	6.5	7.9	9.3		127	81			12.6	24.6
		23.7685	11.675	8.51	7.85		124.75	79.55			13.95	24.01

## Sheet: 工作表6
307	87	244
282	80	212
292	80	222
305	81	236
285	78	213
338	62	250
312	62	224
279	71	200
305	81	236
309	79	238
263	73	186
266	89	205
293	78	221
267	78	195
308	80	238
335	78	263
334	70	254
290	92	232
297	88	235
300	75	225
273	70	193
317	75	242
348	85	283
297	72	219
313	83	246
217	76	143
288	80	218
323	80	253
274	75	199
283	69	202
321	80	251
337	75	262
322	79	251
283	79	212
267	85	202
295	90	245
297	73	230
273	79	212
313	84	397
305	88	393
303	79	382
322	93	415
303	78	381
294	83	377
304	70	374
301	84
275	86
306	83
334	76
290
297
323
274
306
297
304
301
275
337
317
