# Supplementary material for: Choroidal structural changes correlate with severity of diabetic retinopathy in diabetes mellitus
Source: BMC Ophthalmol. 2019 Aug 16;19:186. doi: 10.1186/s12886-019-1189-8 (PMC6697939; doi:10.1186/s12886-019-1189-8)
Supplement: Supplementary file 2 — OCT data in this study. (XLSX 38 kb) [file 12886_2019_1189_MOESM2_ESM.xlsx]

## Sheet: Normal
RNFL	Retinal	SFCT	Nasal CT	Temporal CT	TCA	Stromal area (SA)	Luminal area (LA)	CVI	LA/SA
10	208	215	234	228	841605	260864	580741	0.69004	2.22622
11	241	199	220	200	849259	286296	562963	0.662887	1.96636
10	248	205	235	231	603951	182469	421481	0.697874	2.30988
11	229	212	238	237	580494	191605	388889	0.669928	2.02964
13	280	216	245	220	583333	274815	308519	0.528889	1.12264
15	221	199	240	240	660247	189506	470741	0.712977	2.48404
10	276	228	231	223	735556	250247	485309	0.659785	1.93932
10	251	208	244	248	982593	462346	520247	0.529464	1.12523
10	225	228	226	212	783827	218272	565556	0.721531	2.59106
12	283	242	245	211	1.07309e+06	318148	754938	0.70352	2.37291
11	234	218	249	258	773951	218519	555432	0.717658	2.54181
11	259	218	239	218	867407	328395	539012	0.621406	1.64135
16	246	199	244	228	917654	308148	609506	0.6642	1.97796
11	277	202	251	263	1.02716e+06	350617	676543	0.658654	1.92958
10	268	194	226	212	920000	354321	565679	0.614868	1.59652
14	259	207	239	239	860494	235062	625432	0.726829	2.66071
15	252	222	253	206	783827	218272	565556	0.721531	2.59106
13	226	203	234	229	873333	326049	547284	0.626661	1.67853
9	236	213	231	223	789259	202716	586543	0.743157	2.89342
8	238	199	220	200	660247	289506	370741	0.561518	1.2806
13	238	225	220	200	855309	230370	624938	0.730658	2.71275
9	280	229	240	200	929753	307407	622346	0.669367	2.0245
10	239	205	247	189	932222	259753	672469	0.721361	2.58888
10	230	216	242	205	889259	289383	599877	0.67458	2.07295
11	254	228	242	205	613704	140741	472963	0.77067	3.36053
13	230	194	224	189	873333	326049	547284	0.626661	1.67853
10	215	209	253	203	789259	202716	586543	0.743157	2.89342
11	215	212	245	199	966049	330494	635556	0.657891	1.92305
10	223	198	236	215	889259	389383	499877	0.562127	1.28377
12	225	210	226	259	1.0658e+06	335309	730494	0.685393	2.17857
10	220	237	255	195	903210	296543	606667	0.671679	2.0458
11	250	204	259	205	714691	173951	540741	0.756607	3.10859
13	220	220	210	200	591235	116790	474444	0.802464	4.06237
9	225	220	190	199	698889	241975	456914	0.653771	1.88827
10	244	224	197	224	812840	263774	549065	0.67549	2.08157
11	237	200	200	215	765926	282099	483827	0.631689	1.7151
10	213	207	203	211	657531	195062	462469	0.703342	2.37089
11	227	215	222	205	634815	195185	439630	0.692532	2.25237
11.1579	240.579	212.632	233.026	216.947	809220	264294	544927	0.675337	2.18949

## Sheet: DM
RNFL	Retinal	SFCT	Nasal CT	Temporal CT	TCA	Stromal area (SA)	Luminal area (LA)	CVI	LA/SA
17	235	200	249	223	813580	299436	514144	0.631953
13	248	184	219	209	828691	281153	547538	0.660726
10	235	204	219	216	676333	222970	453364	0.670326
13	250	189	218	173	740222	233357	506865	0.684747
10	236	198	200	188	697358	253376	443982	0.636663
10	243	196	206	203	829494	247088	582406	0.702122
10	229	196	201	199	789728	283668	506061	0.640804
13	241	201	226	202	776247	266231	510015	0.657027
13	226	199	214	200	812000	293443	518557	0.638617
10	240	189	235	218	841272	272948	568324	0.675553
10	250	184	199	186	802099	294769	507330	0.632503
9	239	207	222	212	869568	298774	570794	0.656411
13	233	200	224	202	886840	335882	550957	0.621259
10	216	188	204	206	792099	275677	516422	0.651966
10	227	183	216	213	884568	315219	569349	0.643647
11	210	207	234	233	836988	276613	560375	0.669513
13	248	194	204	184	862000	303379	558621	0.648052
11	229	196	232	200	740729	263565	477163	0.644181
10	233	175	215	206	868988	242996	625992	0.720369
13	247	179	225	218	815315	332769	482546	0.591852
10	244	196	193	186	862546	315626	546920	0.634076
10	222	207	212	195	735512	255556	479956	0.652546
13	218	230	245	206	792914	293316	499598	0.630078
13	224	201	210	204	673988	254183	419805	0.622867
13	225	222	241	224	745031	251223	493807	0.662801
10	233	209	248	228	995105	246764	748341	0.752022
10	226	202	228	238	806944	295370	511575	0.633965
13	243	230	232	223	884000	335435	548565	0.620548
10	237	204	215	214	789858	323434	466424	0.590516
13	213	231	249	227	878333	362562	515772	0.587216
9	234	212	223	224	934074	286714	647360	0.69305
13	229	222	220	243	1.04257e+06	393570	648998	0.6225
13	243	195	221	208	937531	391713	545818	0.582187
11	282	223	237	242	878210	338315	539895	0.614768
9	244	230	236	221	795580	350783	444797	0.559085
13	251	209	251	239	884247	376395	507852	0.574333
10	224	198	222	206	805562	315920	489642	0.607827
13	242	206	227	242	770383	247004	523379	0.679375
13	248	221	236	228	869784	290665	579119	0.66582
10	256	227	231	247	941272	334586	606686	0.644539
15	283	222	241	221	847593	264829	582764	0.687552
11	224	258	275	190	902247	334997	567250	0.628708
10	231	222	230	195	733173	309877	423296	0.577349
13	222	207	245	228	880370	258946	621425	0.705867
13	234	212	269	260	966049	280494	685556	0.709649
12	249	222	247	222	811383	363058	448325	0.552544
10	218	247	275	249	911383	325768	585615	0.642556
12	226	238	267	227	985556	322069	663486	0.673211
11	229	220	235	231	808123	319978	488146	0.604048
11	255	207	236	222	748716	301923	446793	0.596745
16	236	249	263	221	899951	275925	624026	0.6934
11	247	222	241	237	811383	321364	490018	0.60393
10	283	238	258	229	998741	336621	662120	0.662955
14	244	217	250	236	843901	312778	531123	0.629367
15	243	239	264	292	969901	355157	614744	0.633822
13	260	217	243	247	840173	318991	521182	0.620327
9	268	254	258	231	1.00946e+06	394907	614550	0.608792
8	261	228	260	244	830247	348235	482013	0.580565
13	230	215	240	222	871729	393419	478310	0.548692
9	242	213	237	216	856025	402173	453852	0.530186
10	236	234	251	221	957038	377519	579519	0.605534
11	241	222	239	232	849136	358946	490191	0.577281
10	224	211	225	205	813482	363058	450424	0.553699
10	250	232	243	240	940173	343122	597051	0.635044
11	244	243	263	202	1.00812e+06	326942	681182	0.675693
13	231	239	253	245	948717	360488	588229	0.620026
11.5	238.848	213.212	234.045	219.712	851975	310970	541005	0.634333

## Sheet: no-DR(22)
before										after
RNFL	Retinal	SFCT	Nasal CT	Temporal CT	TCA	Stromal area (SA)	Luminal area (LA)	CVI	LA/SA
17	235	200	249	223	813580	299436	514144	0.631953
13	248	184	219	209	828691	281153	547538	0.660726
10	235	204	219	216	676333	222970	453364	0.670326
13	250	189	218	173	740222	233357	506865	0.684747
10	236	198	200	188	697358	253376	443982	0.636663
10	243	196	206	203	829494	247088	582406	0.702122
10	229	196	201	199	789728	283668	506061	0.640804
13	241	201	226	202	776247	266231	510015	0.657027
13	226	199	214	200	812000	293443	518557	0.638617
10	240	189	235	218	841272	272948	568324	0.675553
10	250	184	199	186	802099	294769	507330	0.632503
9	239	207	222	212	869568	298774	570794	0.656411
13	233	200	224	202	886840	335882	550957	0.621259
10	216	188	204	206	792099	275677	516422	0.651966
10	227	183	216	213	884568	315219	569349	0.643647
11	210	207	234	233	836988	276613	560375	0.669513
13	248	194	204	184	862000	303379	558621	0.648052
11	229	196	232	200	740729	263565	477163	0.644181
10	233	175	215	206	868988	242996	625992	0.720369
13	247	179	225	218	815315	332769	482546	0.591852
10	244	196	193	186	862546	315626	546920	0.634076
10	222	207	212	195	735512	255556	479956	0.652546
11.3182	235.5	194.182	216.682	203.273	807372	280204	527167	0.652951

## Sheet: NPDR(24)
before										after
RNFL	Retinal	SFCT	Nasal CT	Temporal CT	TCA	Stromal area (SA)	Luminal area (LA)	CVI	LA/SA		SFCT	Nasal CT	Temporal CT	TCA	Stromal area (SA)	Luminal area (LA)	CVI
13	218	230	245	206	792914	293316	499598	0.630078			212	238	237	580494	201605	378889	0.652701
13	224	201	210	204	673988	254183	419805	0.622867			214	245	220	583333	274815	308519	0.528889
13	225	222	241	224	745031	251223	493807	0.662801			204	240	240	660247	289506	370741	0.561518
10	233	209	248	228	995105	246764	748341	0.752022			222	231	223	735556	250247	485309	0.659785
10	226	202	228	238	806944	295370	511575	0.633965			225	244	248	882593	462346	420247	0.476151
13	243	230	232	223	884000	335435	548565	0.620548			228	226	212	783827	268272	515556	0.657741
10	237	204	215	214	789858	323434	466424	0.590516			219	245	211	933086	318148	614938	0.659037
13	213	231	249	227	878333	362562	515772	0.587216			218	249	258	753951	238519	515432	0.683642
9	234	212	223	224	934074	286714	647360	0.69305			218	239	218	867407	328395	539012	0.621406
13	229	222	220	243	1.04257e+06	393570	648998	0.6225			204	244	228	717654	308148	409506	0.570618
13	243	195	221	208	937531	391713	545818	0.582187			202	251	263	1.02716e+06	350617	676543	0.658654
11	282	223	237	242	878210	338315	539895	0.614768			214	226	212	920000	354321	565679	0.614868
9	244	230	236	221	795580	350783	444797	0.559085			207	239	239	860494	235062	625432	0.726829
13	251	209	251	239	884247	376395	507852	0.574333			222	253	206	783827	218272	565556	0.721531
10	224	198	222	206	805562	315920	489642	0.607827			223	234	229	873333	326049	547284	0.626661
13	242	206	227	242	770383	247004	523379	0.679375			213	231	223	789259	252716	536543	0.679806
13	248	221	236	228	869784	290665	579119	0.66582			199	220	200	660247	289506	370741	0.561518
10	256	227	231	247	941272	334586	606686	0.644539			225	220	200	855309	230370	624938	0.730658
15	283	222	241	221	847593	264829	582764	0.687552
11	224	258	275	190	902247	334997	567250	0.628708			214.944	237.5	225.944	792654	288717	503937	0.63289
10	231	222	230	195	733173	309877	423296	0.577349
13	222	207	245	228	880370	258946	621425	0.705867
13	234	212	269	260	966049	280494	685556	0.709649
12	249	222	247	222	811383	363058	448325	0.552544
11.7917	238.125	217.292	236.625	224.167	856925	312506	544419	0.633549

## Sheet: PDR(20)
before										after
RNFL	Retinal	SFCT	Nasal CT	Temporal CT	TCA	Stromal area (SA)	Luminal area (LA)	CVI	LA/SA		SFCT	Nasal CT	Temporal CT	TCA	Stromal area (SA)	Luminal area (LA)	CVI
10	218	247	275	249	911383	325768	585615	0.642556			211	249	223	813580	319436	494144	0.60737
12	226	238	267	227	985556	322069	663486	0.673211			234	219	209	828691	321153	507538	0.612458
11	229	220	235	231	808123	319978	488146	0.604048			214	219	216	676333	312970	363364	0.537255
11	255	207	236	222	748716	301923	446793	0.596745			233	218	173	740222	303357	436865	0.590181
16	236	249	263	221	899951	275925	624026	0.6934			221	200	188	697358	253376	443982	0.636663
11	247	222	241	237	811383	321364	490018	0.60393			216	206	203	829494	317088	512406	0.617733
10	283	238	258	229	998741	336621	662120	0.662955			222	201	199	789728	303668	486061	0.615478
14	244	217	250	236	843901	312778	531123	0.629367			210	226	202	776247	296231	480015	0.61838
15	243	239	264	292	969901	355157	614744	0.633822			219	214	200	812000	333443	478557	0.589356
13	260	217	243	247	840173	318991	521182	0.620327			243	235	218	941272	292948	648324	0.688774
9	268	254	258	231	1.00946e+06	394907	614550	0.608792			235	199	186	902099	364769	537330	0.595644
8	261	228	260	244	830247	348235	482013	0.580565			237	222	212	869568	298774	570794	0.656411
13	230	215	240	222	871729	393419	478310	0.548692			220	224	202	886840	365882	520957	0.587431
9	242	213	237	216	856025	402173	453852	0.530186			211	204	206	792099	275677	516422	0.651966
10	236	234	251	221	957038	377519	579519	0.605534			226	216	213	984568	345219	639349	0.64937
11	241	222	239	232	849136	358946	490191	0.577281			207	234	233	836988	326613	510375	0.609775
10	224	211	225	205	813482	363058	450424	0.553699			201	204	184	862000	323379	538621	0.62485
10	250	232	243	240	940173	343122	597051	0.635044			229	232	200	880729	313565	567163	0.643971
11	244	243	263	202	1.00812e+06	326942	681182	0.675693			237	215	206	868988	302996	565992	0.651323
13	231	239	253	245	948717	360488	588229	0.620026			226	225	218	875315	342769	532546	0.608405
11.35	243.4	229.25	250.05	232.45	895098	342969	552129	0.614794			222.6	218.1	204.55	833206	315666	517540	0.61964

## Sheet: 1
307	87	244
282	80	212
292	80	222
305	81	236
285	78	213
338	62	250
312	62	224
279	71	200
305	81	236
309	79	238
263	73	186
266	89	205
293	78	221
267	78	195
308	80	238
335	78	263
334	70	254
290	92	232
297	88	235
300	75	225
273	70	193
317	75	242
348	85	283
297	72	219
313	83	246
217	76	143
288	80	218
323	80	253
274	75	199
283	69	202
321	80	251
337	75	262
322	79	251
283	79	212
267	85	202
295	90	245
297	73	230
273	79	212
313	84	397
305	88	393
303	79	382
322	93	415
303	78	381
294	83	377
304	70	374
301	84
275	86
306	83
334	76
290
297
323
274
306
297
304
301
275
337
317
